# Supplementary material for: Migration Intention and the Related Factors among Nursing Students in Iran: A Cross-Sectional Study
Source: Research Square preprint supplement (doi:10.21203/rs.3.rs-5946006/v1), 2025-02-13
Supplement: Supplementary file 1 [file c560f34f2ace18bda365a723.docx]

| Mean(SD) | No(Percentage) | Variable  **Table 1. Demographic, educational and occupational characteristics of the participants (N=248)** |
| --- | --- | --- |
| 22.81(3.55) |  | **Age (year)** |
|  | 207(83.5) | 25> |
|  | 27(10.9) | 25-30 |
|  | 14(5.6) | 30≤ |
|  |  | **Gender** |
|  | 114(46.0) | Male |
|  | 134(54.0) | Female |
|  |  | **Marital status** |
|  | 229(92.3) | Single |
|  | 19(7.7) | Married |
| 43.47(33.17) |  | **Family income (million Rials)** |
|  |  | **source of income** |
|  | 64(25.8) | independent |
|  | 184(74.2) | dependent |
|  |  | **Living abroad experience** |
|  | 242(97.6) | No |
|  | 6(2.4) | Yes |
|  |  | **Residence of relatives abroad** |
|  | 154(62.1) | No |
|  | 94(37.9) | Yes |
|  |  | **Foreign language proficiency** |
|  | 39(15.7) | Weak |
|  | 121(48.8) | Moderate |
|  | 88(35.5) | Good |
|  |  | **Degree** |
|  | 219(88.3) | undergraduate student |
|  | 23(9.3) | Master's student |
|  | 6(2.4) | PhD student |
| 18.29(1.37) |  | **GPA of the previous semester** |
|  |  | **Interest in nursing** |
|  | 73(29.4) | No |
|  | 175(70.6) | Yes |
|  |  | **choose nursing as a channel for immigration** |
|  | 238(96.0) | No |
|  | 10(4.0) | Yes |
|  |  | **Work experience in the nursing profession** |
|  | 47(19/0) | Lack of work experience |
|  | 171(69/0) | Clinical work experience as a student |
|  | 21(8.5) | Clinical work experience as a nurse |
|  | 9(3.6) | Clinical work experience as a nurse instructor |

Table 2. Descriptive Indices of Scores of Factors Related to the Inclination to Migrate of the participants (N=248)

| **Mean (Interquartile Range)** | **Mean(SD)** | **Observed Range** | **Possible Range** | **Variable** |
| --- | --- | --- | --- | --- |
| 30.6(22.2-41.7) | 32.6(16.0) | 0-86.1 | 0-100 | origin attraction |
| 68.8(56.3-75.0) | 65.2(14.4) | 6.3-100 | 0-100 | origin repulsion |
| 75.0(64.3-85.7) | 73.0(17.6) | 25.0-100 | 0-100 | destination attraction |

**Table 3. Multivariate Analysis of Factors Related to Migration Intention Score of the participants (N=248)**

| **P** | **Standardized Coefficient(β)** | **95% confidence interval for b** | **Unstandardized Coefficient (b)** | **Variables** |
| --- | --- | --- | --- | --- |
|  | | | | Age (year) |
| Reference Category | | | | 25> |
| 0.947 | 0.003- | (6.07 , 6.49-) | 0.21- | 25-30 |
| 0.702 | 0.023- | (8.29 , 12.30-) | 2.00- | 30≤ |
| 0.085 | 0.075- | (0.43 , 6.53-) | 3.05- | Gender (female to male) |
| 0.828 | 0.010- | (8.02 , 6.42-) | 0.80 | Marital status (single to married) |
| 0.137 | 0.081- | (0.01 , 0.11-) | 0.05- | Family income (million Rials) |
|  | | | | source of income |
| Reference Category | | | | independent |
| 0.468 | 0.041- | (3.25 , 7.04-) | 1.90- | dependent |
| 0.017 | 0.099 | (23.85 , 2.39) | 13.12 | Living abroad experience(Yes to No) |
| 0.327 | 0.040 | (4.98 , 1.66-) | 1.66 | Residence of relatives abroad (Yes to No) |
|  | | | | Foreign language proficiency |
| Reference Category | | | | Weak |
| 0.007 | .0157 | (10.99 , 1.73) | 6.36 | Moderate |
| 0.079 | 0.103 | (9.29 , 0.52-) | 4.38 | Good |
|  | | | | Degree |
| Reference Category | | | | undergraduate student |
| 0.450 | 0.043- | (4.88 , 10.95-) | 3.04- | Master's student |
| 0.270 | 0.068- | (7.03 , 25.03-) | 9.00- | PhD student |
| 0.555 | 0.024 | (1.54 , 0.83-) | 0.36 | GPA of the previous semester |
| 0.082 | 0.070- | (0.40 , 6.62-) | 3.11- | Interest in nursing(Yes to No) |
| 0.032 | 0.085 | (16.79 , 0.78) | 8.78 | choose nursing as a channel for immigration(Yes to No) |
|  | | | | Work experience in the nursing profession |
| Reference Category | | | | Lack of work experience |
| 0.904 | 0.005- | (3.81 , 4.30-) | 0.25- | Clinical work experience as a student |
| 0.313 | 0.055 | (11.73 , 3.78-) | 3.98 | Clinical work experience as a nurse |
| 0.503 | 0.037 | (15.76 , 7.76-) | 4.00 | Work experience as a nursing instructor |
| 0.001> | 0.305- | (0.25- , 0.52-) | 0.39- | origin attraction |
| 0.116 | 0.088 | (0.28 , 0.03-) | 0.12 | origin repulsion |
| 0.001> | 0.464 | (0.66 , 0.42) | 0.54 | destination attraction |
| 0.673 | | | | The coefficient of determination (R²) |
